# Supplementary material for: Adjusting Overall Survival Estimates after Treatment Switching: a Case Study in Metastatic Castration-Resistant Prostate Cancer
Source: Springer Nature journal article supplement (doi:10.1007/s11523-016-0472-3), 2016-12-15
Supplement: MOESM8 [file 11936720]

**Online Resource 8**

Adjusting Overall Survival Estimates After Treatment Switching: A Case Study in Metastatic Castration-Resistant Prostate Cancer

Konstantina Skaltsa1, Cristina Ivanescu2, Shevani Naidoo3,De Phung4, Stefan Holmstrom5, Nicholas R. Latimer6

1Quintiles Advisory Services, C/ Sardenya, 537 – 539 08024, Barcelona, Spain; 2Quintiles, Siriusdreef 10 Beukenhorst Zuid 2132 WT, Hoofddorp, Netherlands; 3Astellas Medical Affairs, Global Health Economic Outcomes Research (HEOR), 2000 Hillswood Dr, Chertsey, Surrey KT16 0PS, UK; 4Astellas Pharma Global Development, Sylviusweg 62, 2333 BE, Leiden, Netherlands; 5Astellas Medical Affairs, Global HEOR, Sylviusweg 62, 2333 BE, Leiden, Netherlands; 6School of Health and Related Research, University of Sheffield, Regent Court, 30 Regent Street, Sheffield, S1 4DA, UK

Correspondence: Shevani Naidoo, Astellas Medical Affairs, Global HEOR, 2000 Hillswood Dr, Chertsey, Surrey KT16 0PS, UK; email: Shevani.Naidoo@astellas.com

**Table** Overall survival analysis: unadjusted and adjusted results

| **Analysis** | **Treatment** | **Events, n** | **Median (95% CI) time to event, months** | **HR (95% CI)** |
| --- | --- | --- | --- | --- |
| **Unadjusted ITT analysis** | | | | |
|  | Enzalutamide | 241 | 32.36 (30.09–NYR) | 0.71 (0.60–0.84) |
|  | Placebo | 299 | 30.19 (27.96–NYR) |
| **Two-stage method (full models)** | | | | |
| Weibull AF with recensoring | Enzalutamide | 106 | NYR | 0.65 (0.45–0.80) |
| Placebo | 222 | NYR |
| Weibull AF without recensoring | Enzalutamide | 241 | 31.47 (30.09–NYR) | 0.69 (0.58–0.83) |
| Placebo | 299 | 30.00 (26.87–NYR) |
| Gamma AF with recensoring | Enzalutamide | 198 | NYR | 0.62 (0.47–0.81) |
| Placebo | 216 | NYR |
| Gamma AF without recensoringa | Enzalutamide | 241 | 32.36 (30.09–NYR) | 0.66 (0.57–0.81) |
| Placebo | 299 | 28.71 (26.87–NYR) |
| **IPCW method (full models)** | | | | 0.63 (0.52–0.75) |

aPreferred approach for two-stage method

*AF* acceleration factor, *CI* confidence interval, *HR* hazard ratio, *IPCW* inverse probability of censoring weights, *ITT* intention to treat, *NYR* not yet reached
